# Supplementary material
Source: publisher site journal article supplement (https://www.dovepress.com/article/400283)
Supplement: Supplementary file 1 [file get_supplementary_file.php]

Figure S1


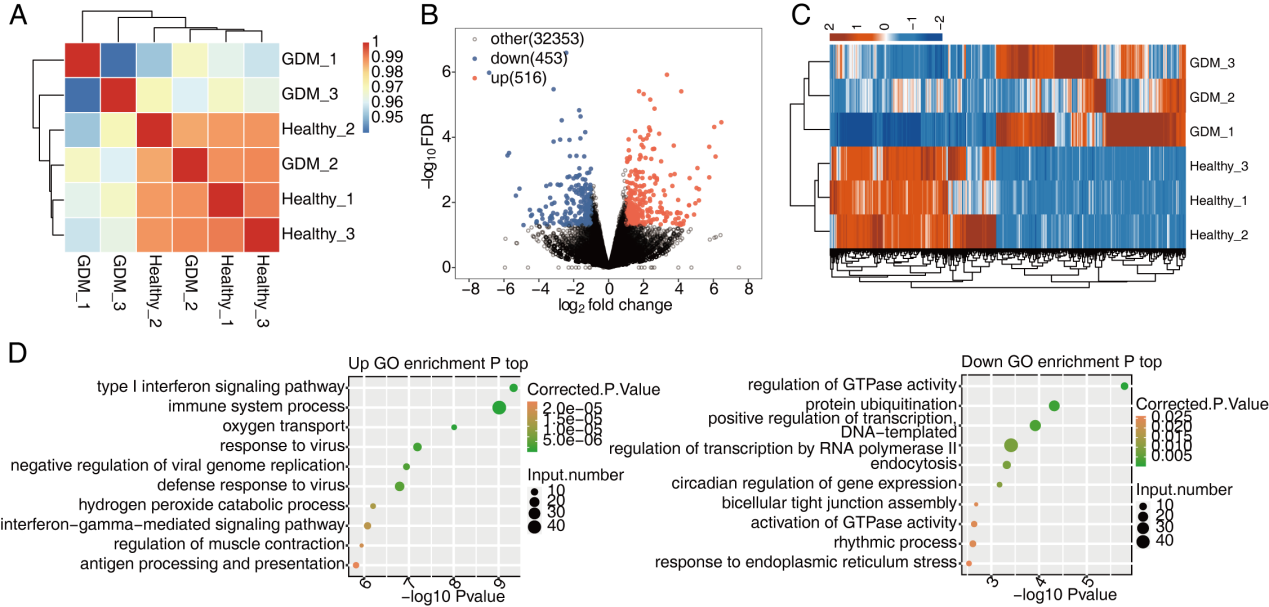


**FigS1. RNA-seq data analysis**

1. Heat map showing the hierarchically clustered Pearson correlation matrix resulting from all sample.
2. Volcano plot showing all differentially expressed genes (DEGs) between GDM and Healthy samples.
3. Hierarchical clustering heat map showing expression levels of all DEGs.
4. The Scatter plot exhibiting the most enriched GO biological process results of the up- regulated (Left panel) and down-regulated (Right panel) DEGs
